# Supplementary material for: Skin dendritic cells in melanoma are key for successful checkpoint blockade therapy
Source: PubMed Central journal article supplement (PMC7789456; doi:10.1136/jitc-2020-000832), 2021-01-06
Supplement: jitc-2020-000832supp003.pdf [file jitc-2020-000832supp003.pdf]

## Supplementary Tables

**Supplementary Table 1.** Reagents used for *in vivo* experimental procedures

| Reagent                       | mAb clones | Route of administration/<br>amount per mouse per<br>injection | Company                                                                |
|-------------------------------|------------|---------------------------------------------------------------|------------------------------------------------------------------------|
| Recombinant human Flt3 ligand | N/A        | i.p./10 µg                                                    | Kindly provided by Tibor Keler, Celldex Therapeutics, Hampton, NJ, USA |
| Anti-mouse PD-L1 blocking mAb | MIH5       | i.p./ 200 µg                                                  | Produced in-house                                                      |
| Anti-mouse PD-1 blocking mAb  | RMP1-14    | i.p./ 100 µg                                                  | Produced in-house                                                      |
| Anti-mouse TIM-3 blocking mAb | RMT3-23    | i.p./ 100 µg                                                  | BioXcell, USA                                                          |
| Anti-mouse CD40 agonistic mAb | FGK45      | i.d./25 µg                                                    | Produced in-house                                                      |
| Poly I:C                      | N/A        | i.d./25 µg                                                    | Sigma-Aldrich                                                          |
| Anti-b-Gal rIgG1 mAb          | GL113      | i.d./1,6 µg                                                   | Produced in-house                                                      |
| Anti-b-Gal rIgG2a mAb         | GL117      | i.d./12,5 µg or i.p./200 µg                                   | Produced in-house                                                      |

**Supplementary Table 2.** Anti-mouse antibodies used for flow cytometry

| <b>Antibody</b>            | <b>Clone</b> | <b>Company</b>           |
|----------------------------|--------------|--------------------------|
| CD45 FITC                  | 30-F11       | eBioscience              |
| CD207 (Langerin) Alexa 488 | 929F3.01     | Dendritics, Lyon, France |
| CD279 (PD-1) PE            | RMP1-30      | Biolegend                |
| CD40 PE                    | 3/23         | BD Biosciences           |
| CD274 (PD-L1) PE           | MIH5         | eBioscience              |
| MHC-II PE                  | M5/114.15.2  | eBioscience              |
| CD207 (Langerin) PE        | 929F3.01     | Produced in-house        |
| FoxP3-PE                   | FJK-16s      | eBioscience              |
| MHC II PE/Dazzle 594       | M5/114.15.2  | Biolegend                |
| CD3 PE/Dazzle 594          | 145-2C11     | BD Biosciences           |
| CD45 PerCP-Cy5.5           | 30-F11       | BD Biosciences           |
| CD3 PerCP-Cy5.5            | 17A2         | Biolegend                |
| CD8a PerCP-Cy5.5           | 53-6.7       | Biolegend                |
| CD3 PE-Cy7                 | 17A2         | Biolegend                |
| CD279 (PD-1) PE-Cy7        | RMP1-30      | Biolegend                |
| CD64-PE-Cy7                | X54-5/7.1    | Biolegend                |
| CCR7-PE-Cy7                | 4B12         | Biolegend                |
| CD4 PE-Cy7                 | GK1.5        | eBioscience              |
| CD25 PE-Cy7                | PC61         | Biolegend                |
| TIM-3 APC                  | RMT3-23      | Biolegend                |
| CD11b APC                  | M1/70        | Biolegend                |
| IFN $\gamma$ APC           | XMG1.2       | Biolegend                |
| Ly6G APC                   | 1A8          | BD Biosciences           |
| CD103 AF700                | 2E7          | Biolegend                |
| CD4 BV421                  | GK1.5        | Biolegend                |
| CD8a BV421                 | 53-6.7       | BD Biosciences           |
| TNF $\alpha$ BV421         | MP6-XT22     | Biolegend                |
| CD11c BV421                | N418         | Biolegend                |
| CD103 BV421                | 2E7          | Biolegend                |
| Ly6C BV421                 | HK1.4        | Biolegend                |
| PD-1 BV421                 | RMPI-30      | Biolegend                |
| CD11c BV510                | N418         | Biolegend                |
| CD103 BV510                | 2E7          | Biolegend                |
| CD4 BV510                  | RM4-5        | Biolegend                |
| CD8a BV510                 | 53-6.7       | Biolegend                |
| CD90.1 BV510               | OX-7         | Biolegend                |

**Supplementary Table 3.** Primers used for RT-qPCR

---

| <b>Gene id/protein</b> | <b>Code or sequence</b>                                                   | <b>Company</b> |
|------------------------|---------------------------------------------------------------------------|----------------|
| Cd274/PD-L1            | Mm00452054_m1                                                             | Thermofisher   |
| Lgals9/Galectin-9      | Mm00495295_m1                                                             | Thermofisher   |
| Tnf/TNF $\alpha$       | Mm00443258_m1                                                             | Thermofisher   |
| Cxcl9                  | Mm00434946_m1                                                             | Thermofisher   |
| Cxcl10                 | Mm00445235_m1                                                             | Thermofisher   |
| Gzmb                   | Mm00442834_m1                                                             | Thermofisher   |
| Ifng                   | Mm01168134_m1                                                             | Thermofisher   |
| TATA-binding protein   | Forward:<br>ACTTCGTGCAAGAAATGCTGAA<br>Reverse:<br>TGTCCGTGGCTCTCTTATTCTCA | Microsynth     |

---
