# Supplementary material for: Skin dendritic cells in melanoma are key for successful checkpoint blockade therapy
Source: PubMed Central journal article supplement (PMC7789456; doi:10.1136/jitc-2020-000832), 2021-01-06

## Figure S4

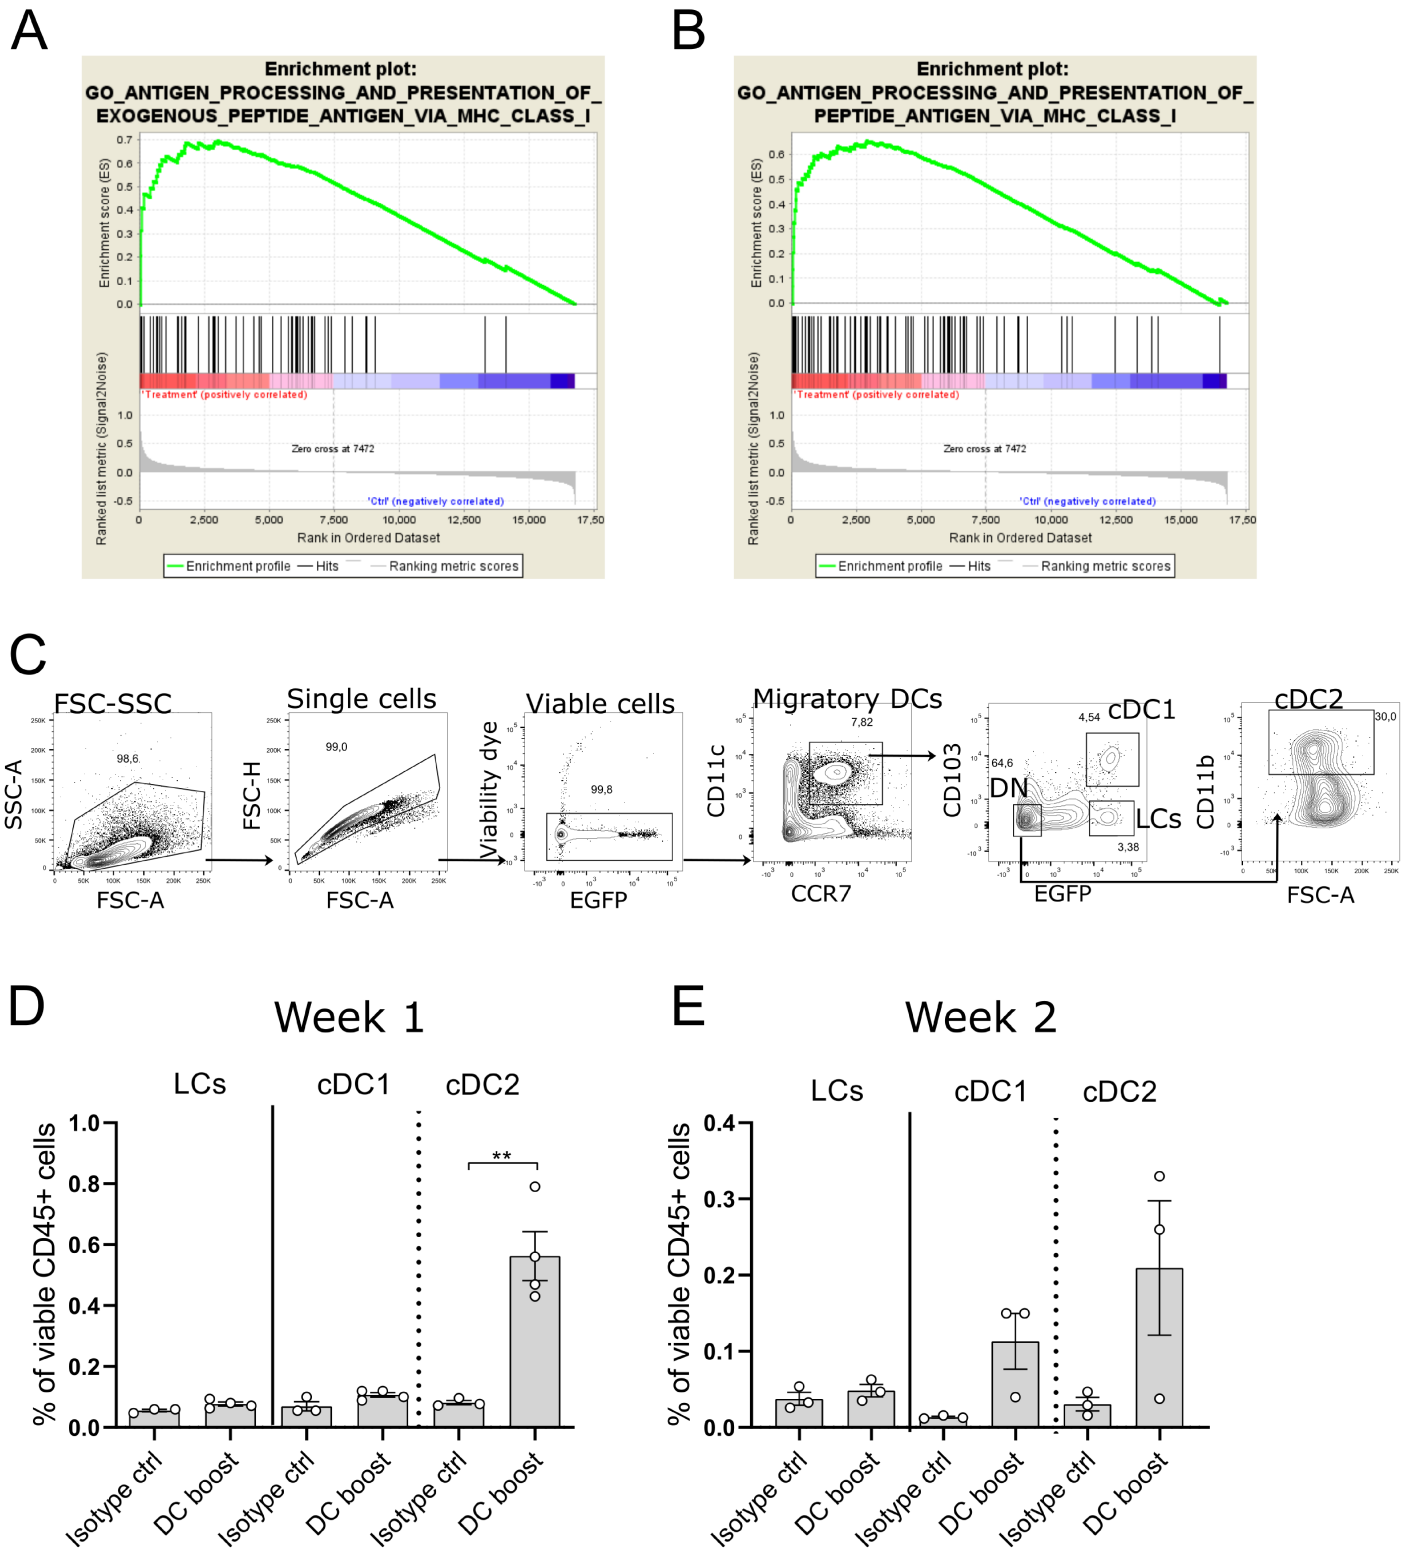

Supplement: jitc-2020-000832supp004.pdf [file jitc-2020-000832supp004.pdf]
