# Supplementary material for: Skin dendritic cells in melanoma are key for successful checkpoint blockade therapy
Source: PubMed Central journal article supplement (PMC7789456; doi:10.1136/jitc-2020-000832), 2021-01-06

# Figure S3

## A Regulatory CD4+ T cells

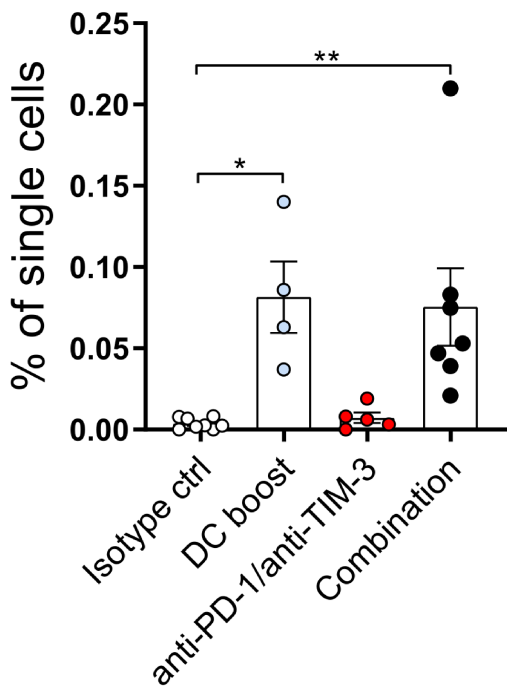

## B MDSC

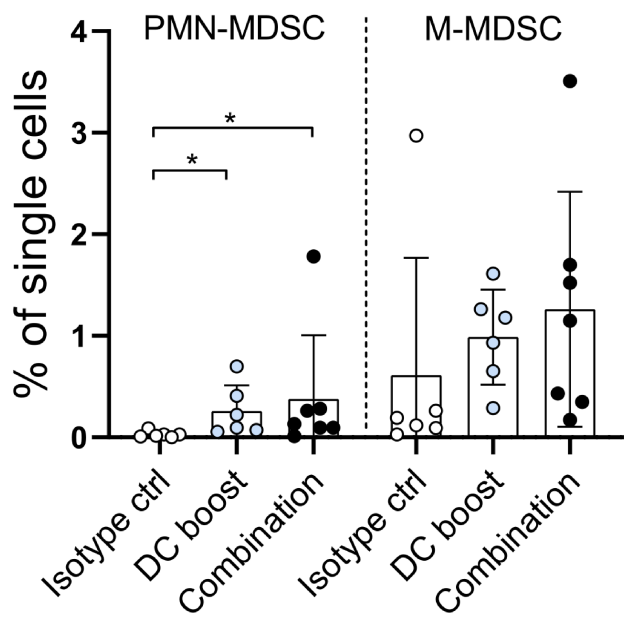

## C Conv. CD4+/Tregs

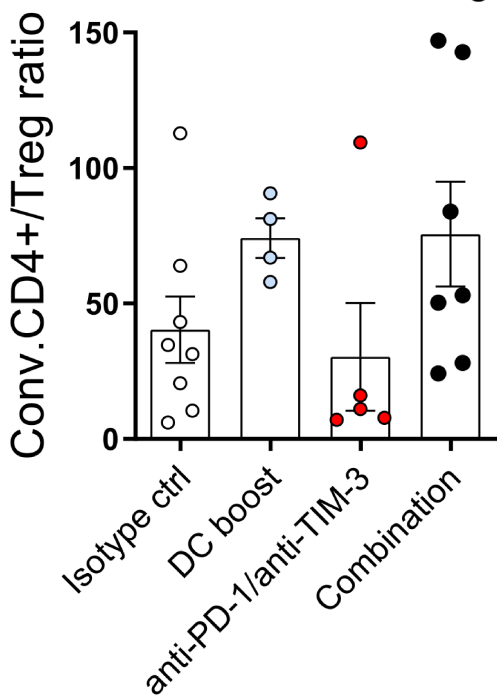

## D CD8+ T cells/Tregs

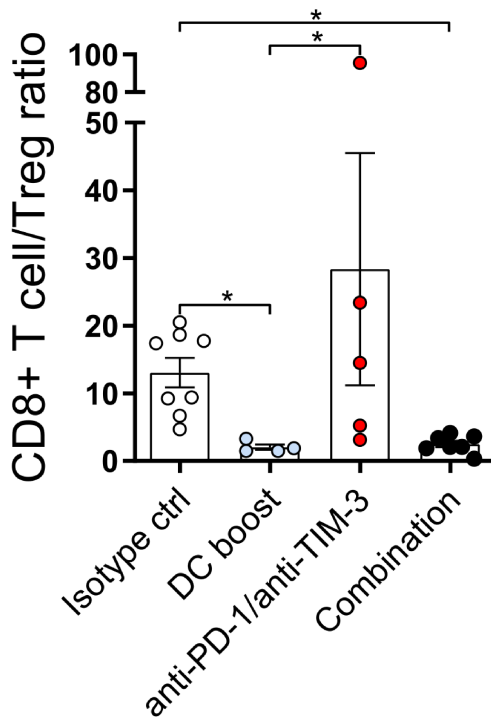

## E CXCL9

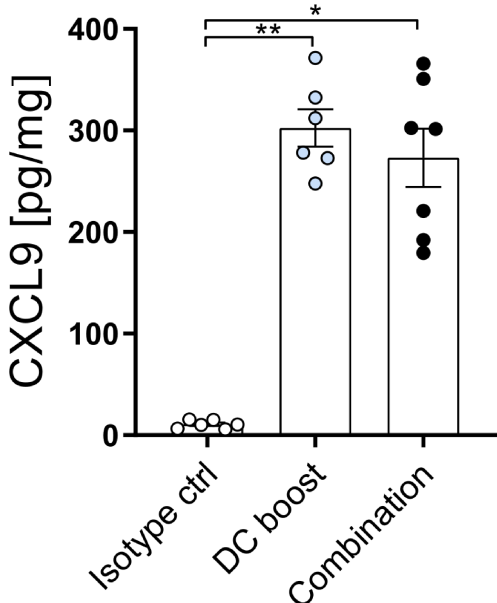

## CXCL10

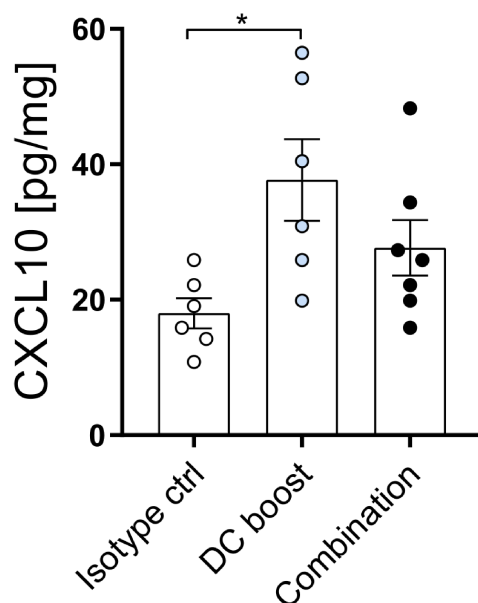

Supplement: jitc-2020-000832supp006.pdf [file jitc-2020-000832supp006.pdf]
