# Supplementary material for: Skin dendritic cells in melanoma are key for successful checkpoint blockade therapy
Source: PubMed Central journal article supplement (PMC7789456; doi:10.1136/jitc-2020-000832), 2021-01-06

## Skin dendritic cells in melanoma are key for successful checkpoint blockade therapy

Anastasia Prokopi<sup>1</sup>, Christoph H. Tripp<sup>1</sup>, Bart Tummers<sup>2</sup>, Florian Hornsteiner<sup>1</sup>, Sarah Spoeck<sup>1</sup>, Jeremy Chase Crawford<sup>2</sup>, Derek R. Clements<sup>3</sup>, Mirjana Efremova<sup>4</sup>, Katharina Hutter<sup>1</sup>, Lydia Bellmann<sup>1</sup>, Giuseppe Cappellano<sup>1</sup>, Bruno L. Cadilha<sup>5</sup>, Sebastian Kobold<sup>5</sup>, Louis Boon<sup>6</sup>, Daniela Ortner<sup>1</sup>, Zlatko Trajanoski<sup>4</sup>, Suzie Chen<sup>7</sup>, Tanja D. de Gruijl<sup>8</sup>, Juliana Idoyaga<sup>3</sup>, Douglas R. Green<sup>2</sup> and Patrizia Stoitzner<sup>1,\*</sup>

- Melanoma progression is accompanied by a decrease in skin cDC2 and upregulation of PD-L1 and Galectin-9 in the tumor microenvironment.
- Responsiveness to checkpoint blockade can be restored by boosting DC function and activation in the tumors.
- Upon DC boost therapy, migratory skin cDC1 and cDC2 can prime melanoma-specific CD8+ T cells in the tumor-draining lymph nodes.

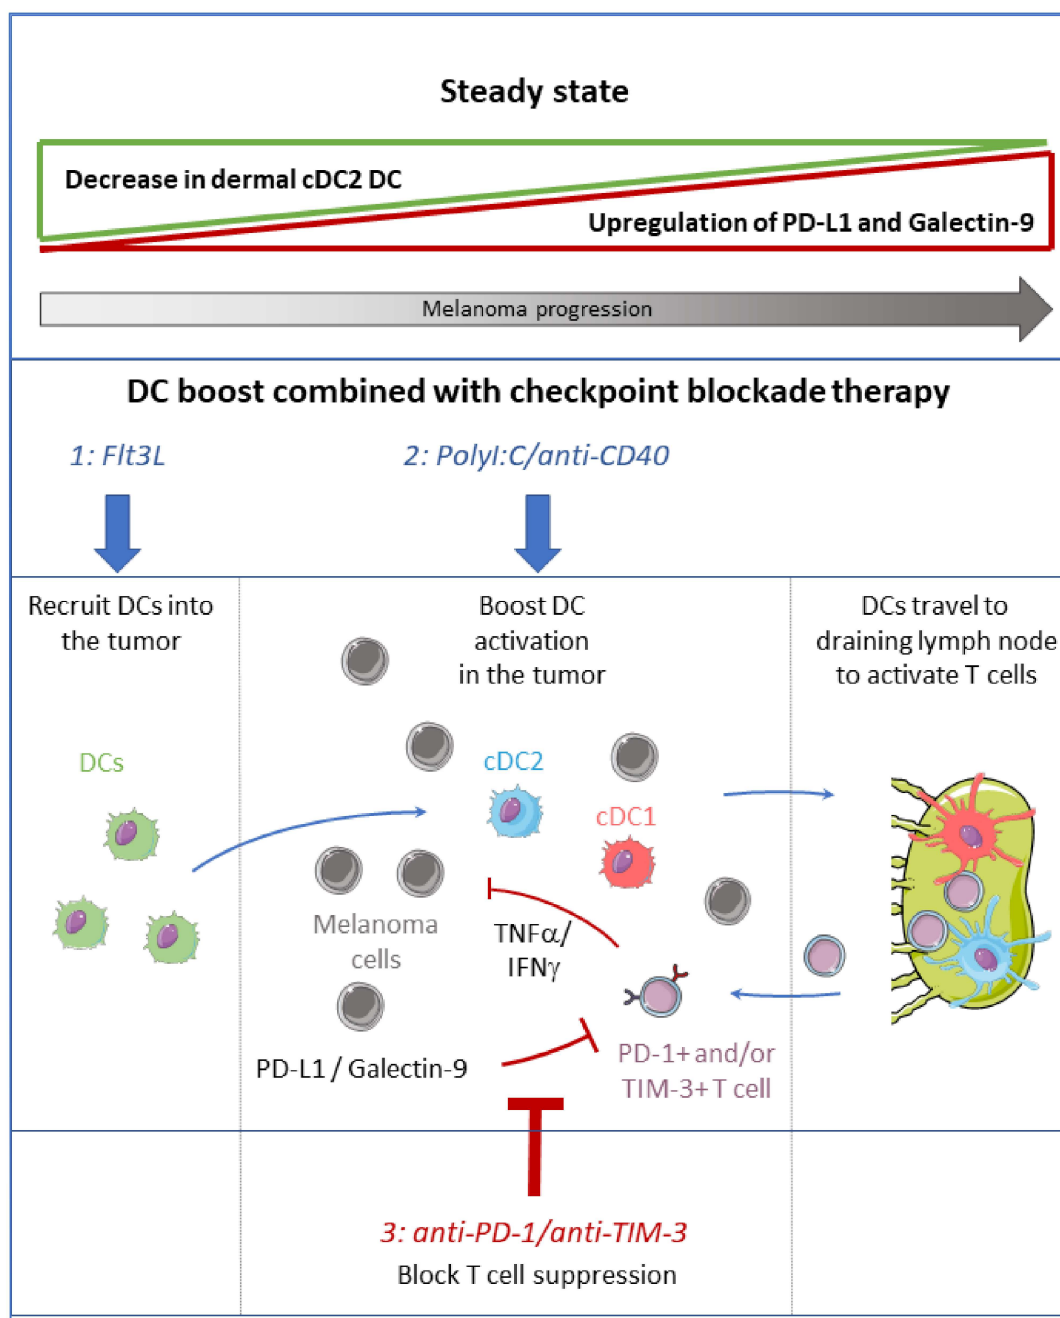

Supplement: jitc-2020-000832supp008.pdf [file jitc-2020-000832supp008.pdf]
